# Supplementary material for: Interactions between hydrogen and tungsten carbide: a first principles study
Source: Royal Society of Chemistry journal article supplement (doi:10.1039/c4ra06225f), 2014-08-18
Supplement: c4ra06225f1.pdf [file c4ra06225f1.pdf]

## Electronic Supplementary Information

### Interactions between Hydrogen and Tungsten Carbide: A First Principles Study

Yongjie Xi<sup>a</sup>, Liang Huang<sup>a, b</sup>, Robert C. Forrey<sup>c</sup> Hansong Cheng<sup>\*, a, b</sup>

*AUTHOR ADDRESS:*

*<sup>a</sup> Department of Chemistry, National University of Singapore, 3 Science Drive 3, Singapore 117543*

*<sup>b</sup> Sustainable Energy Laboratory, Faculty of Material Science and Chemistry, China University of Geosciences, Wuhan 430074, China*

*<sup>c</sup> Department of Physics, Penn State University, Berks Campus,*

## 1. Supporting Figures

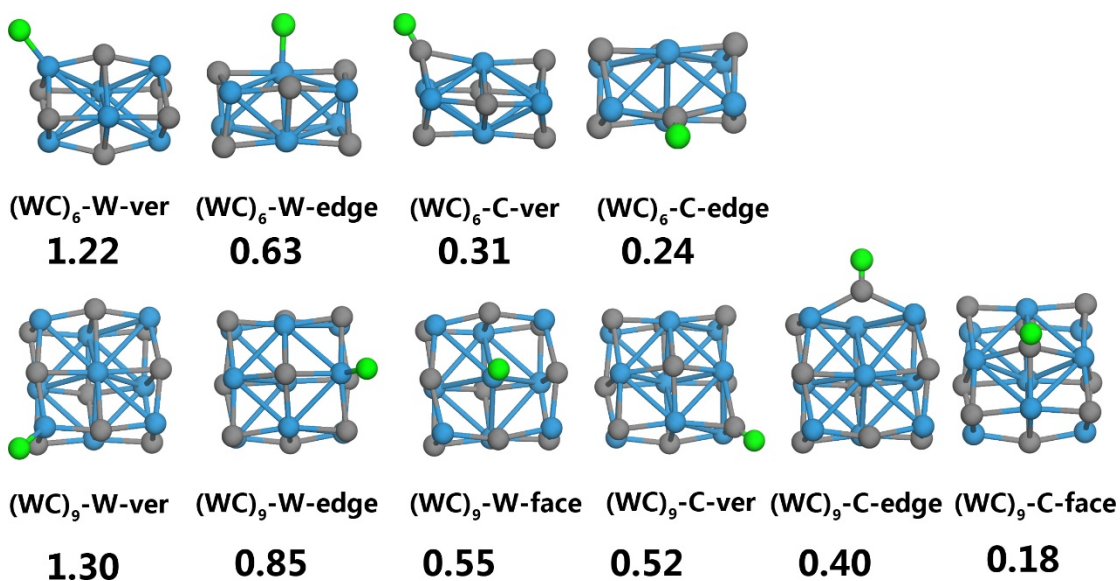

Figure S1

Atomic H adsorption energies (in eV) on various W and C sites for (WC)<sub>6</sub> (vertical and edge sites) and (WC)<sub>9</sub> (vertical, edge

and face sites). The adsorption energy is defined as  $E_{ads} = E_{(WC)_n} + 1/2E_{H_2} - E_{(WC)_n}^H$

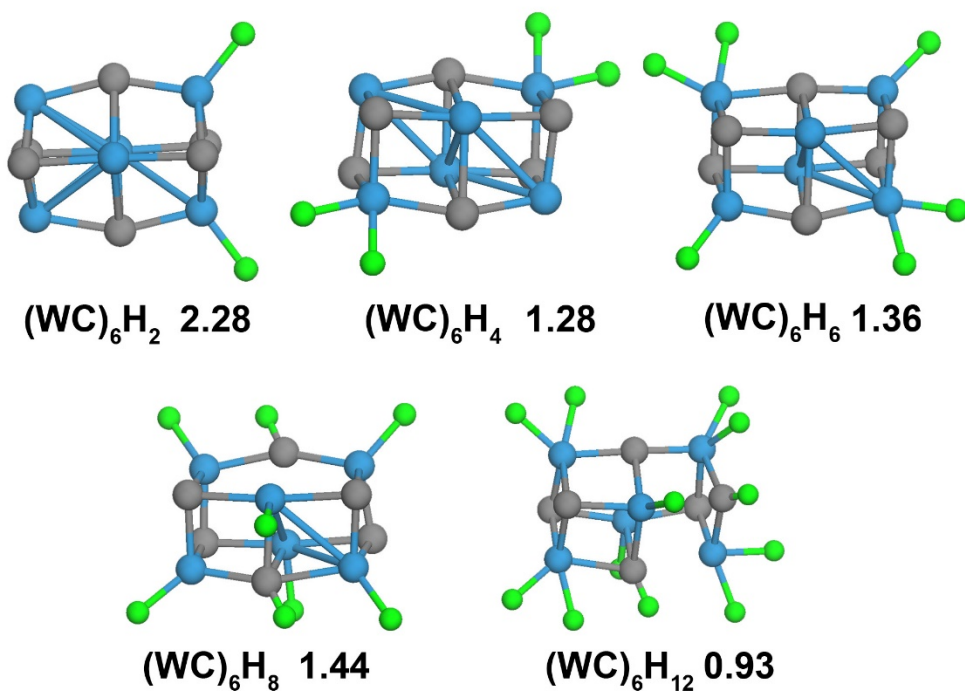

Figure S2

Local minimum structures of H<sub>2</sub> chemisorbed on (WC)<sub>6</sub>; adsorption energies (in eV) are provided.

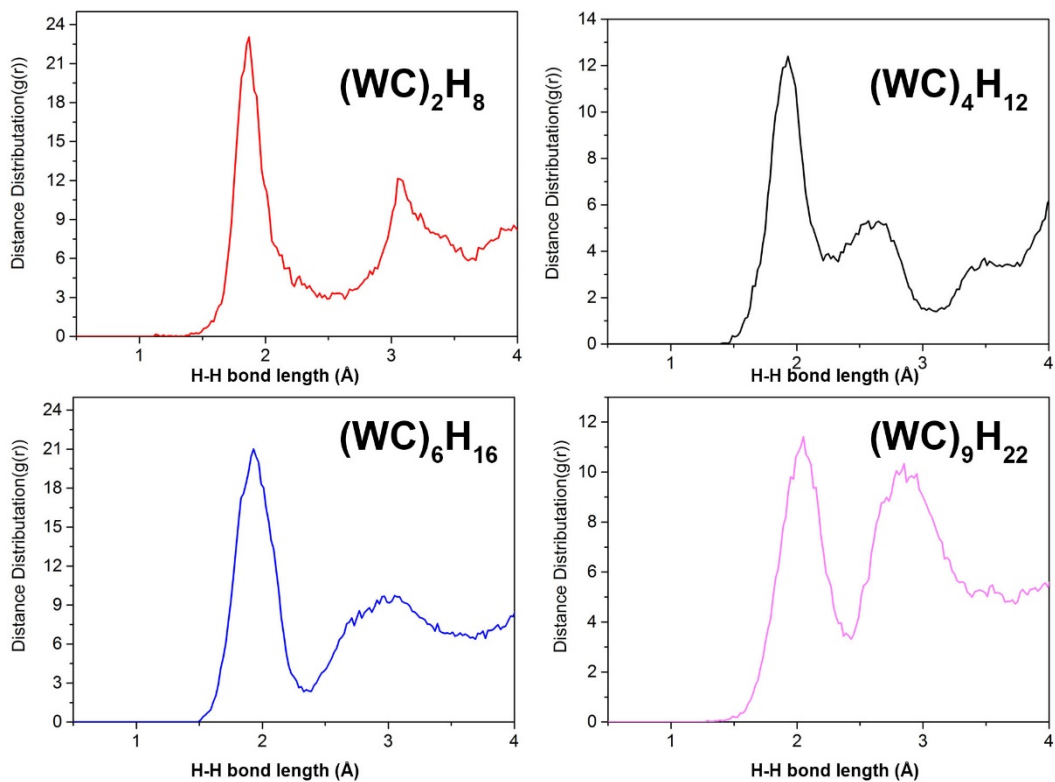

Figure S3

The calculated H-H bond length distributions of the fully saturated  $(WC)_n$  ( $n=2, 4, 6, 9$ )hydrides. No H-H bond peak (ca. 0.74 Å) was detected.  $g(r)$  was obtained by tabulating all the H-H distances at each step of the MD trajectories fitted with Gaussian functions.

## 2. Cartesian coordinates of selected atomic clusters (in Å)

### 2.1 Most stable configurations of (WC)<sub>n</sub> (n=1-10)

WC

|   |            |            |            |
|---|------------|------------|------------|
| C | 0.00000000 | 0.00000000 | 0.00000000 |
| W | 0.00000000 | 0.00000000 | 2.07000000 |

(WC)<sub>2</sub>

|   |            |            |             |
|---|------------|------------|-------------|
| C | 0.00000000 | 0.00000000 | 0.00000000  |
| W | 0.00000000 | 0.00000000 | 1.87698252  |
| C | 1.87324210 | 0.00000000 | 1.81559918  |
| W | 1.87334073 | 0.00003289 | -0.06188253 |

(WC)<sub>3</sub>

|   |             |             |            |
|---|-------------|-------------|------------|
| C | 0.00000000  | 0.00000000  | 0.00000000 |
| C | 0.00000000  | 0.00000000  | 3.00796815 |
| C | 2.60375500  | 0.00000000  | 1.49836819 |
| W | -0.76873446 | -0.88472943 | 1.49726527 |
| W | 1.45128612  | -1.30509769 | 0.48753937 |
| W | 1.69649428  | -0.87895878 | 2.91577712 |

(WC)<sub>4</sub>

|   |             |             |             |
|---|-------------|-------------|-------------|
| C | 0.00000000  | 0.00000000  | 0.00000000  |
| C | 0.00000000  | 0.00000000  | 2.74493594  |
| W | 1.45355743  | 0.00000000  | 1.37244447  |
| W | -1.44910708 | -0.11291826 | 1.37244799  |
| C | -1.44690316 | 1.88626213  | 1.37239130  |
| C | 1.29599625  | 1.99285506  | 1.37243365  |
| W | -0.07757500 | 1.99596335  | -0.07995636 |
| W | -0.07756324 | 1.99605600  | 2.82486680  |

(WC)<sub>5</sub>

|   |             |             |             |
|---|-------------|-------------|-------------|
| C | 0.00000000  | 0.00000000  | 0.00000000  |
| C | 0.00000000  | 0.00000000  | 3.05837870  |
| C | 2.91686404  | 0.00000000  | 2.57544567  |
| C | 1.24179505  | -2.25022648 | 2.16965646  |
| W | -0.38475747 | -1.20330717 | 1.57932809  |
| W | 1.26672096  | 0.98413964  | 1.54012870  |
| W | 2.42579228  | -1.01285860 | 0.89265364  |
| W | 1.58894460  | -0.99142072 | 3.64850562  |
| C | 2.72867232  | -0.51336104 | -1.05664953 |
| W | 1.40592097  | 0.79726821  | -1.09319437 |

(WC)<sub>6</sub>

|   |             |            |             |
|---|-------------|------------|-------------|
| C | 0.00000000  | 0.00000000 | 0.00000000  |
| C | 0.00000000  | 0.00000000 | 2.70467898  |
| W | 1.47206556  | 0.00000000 | 1.33509940  |
| W | -1.42417465 | 0.36032271 | 1.36809525  |
| C | -1.73161908 | 2.36196253 | 1.50299557  |
| C | 2.27600755  | 1.86169442 | 1.18817409  |
| W | 0.36936391  | 2.09724282 | 0.09686485  |
| W | 0.17440419  | 2.12647134 | 2.59488951  |
| C | 0.54364333  | 4.22373923 | -0.01319629 |
| W | 1.96787745  | 3.86331128 | 1.32346084  |

|   |             |            |            |
|---|-------------|------------|------------|
| C | 0.54357205  | 4.22361902 | 2.69150434 |
| W | -0.92823996 | 4.22386103 | 1.35627401 |

(WC)<sub>7</sub>

|   |             |             |             |
|---|-------------|-------------|-------------|
| C | 0.00000000  | 0.00000000  | 0.00000000  |
| C | 0.00000000  | 0.00000000  | 3.54709725  |
| C | 2.54831926  | 0.00000000  | 1.76107852  |
| C | 0.71318266  | -2.96894547 | 3.18794468  |
| C | 2.79892406  | -3.00267313 | 0.93491688  |
| C | 3.67993918  | -2.27735519 | 3.41099353  |
| W | -0.82289326 | -1.72392457 | 2.90718299  |
| W | 0.66564082  | 0.69226607  | 1.77102182  |
| W | 1.01643117  | -1.84417849 | 1.00435688  |
| W | 1.81290907  | -1.10461267 | 3.48159524  |
| W | 2.50673727  | -3.71151473 | 2.76104263  |
| W | 3.88335512  | -1.46470211 | 1.63956095  |
| C | -1.28054950 | -2.09916449 | 0.97527321  |
| W | -0.80992941 | -1.52501628 | -0.76011896 |

(WC)<sub>8</sub>

|   |             |             |             |
|---|-------------|-------------|-------------|
| C | 0.00000000  | 0.00000000  | 0.00000000  |
| C | 0.00000000  | 0.00000000  | 3.15679357  |
| W | 1.60680839  | 0.00000000  | 1.74278473  |
| W | -1.16168969 | 0.30786766  | 1.59152337  |
| C | -0.91923895 | 2.21406155  | 1.93807692  |
| C | 2.50317383  | 1.68353545  | 2.67142030  |
| W | 0.72307132  | 2.22104560  | 0.55438936  |
| W | 0.49459295  | 1.92824272  | 3.34094032  |
| C | 1.16305889  | 4.35833911  | 0.74343801  |
| W | 2.32273589  | 3.79203198  | 2.27057059  |
| C | 3.05525779  | -0.25768023 | 0.25990951  |
| W | 1.72045731  | 0.31867028  | -1.04585811 |
| C | 2.26605898  | 2.25675959  | -1.26587886 |
| W | 3.35137259  | 1.77216740  | 0.73470012  |
| C | 3.79616363  | 3.86838876  | 0.93428519  |
| W | 2.56511998  | 4.09903049  | -0.59489631 |

(WC)<sub>9</sub>

|   |             |             |            |
|---|-------------|-------------|------------|
| C | 0.00000000  | 0.00000000  | 0.00000000 |
| W | 0.00000000  | 0.00000000  | 2.22727381 |
| C | 4.60940388  | 0.00000000  | 0.76575123 |
| C | 3.99181293  | -2.16306001 | 2.84515000 |
| W | 3.85397786  | -0.04300972 | 2.89110888 |
| W | 4.17938593  | -2.00203128 | 0.91813789 |
| C | 2.28085859  | -2.39738347 | 0.36721081 |
| C | 1.78169648  | -0.03012804 | 3.41282219 |
| W | 2.24409505  | -0.03850391 | 0.74613352 |
| W | 1.90530662  | -1.98585423 | 2.55700910 |
| C | -0.16751579 | -2.11516182 | 2.11661469 |
| W | 0.30973471  | -1.98250851 | 0.24439331 |
| C | 4.05597228  | 2.07142779  | 2.86394624 |
| W | 4.22389477  | 1.97135595  | 0.93703986 |

|                    |             |            |             |
|--------------------|-------------|------------|-------------|
| C                  | 2.32657698  | 2.38980992 | 0.39629608  |
| W                  | 1.95059351  | 1.94553723 | 2.55500774  |
| C                  | -0.12251363 | 2.11286843 | 2.11039408  |
| W                  | 0.36275214  | 1.98705233 | 0.23770286  |
| (WC) <sub>10</sub> |             |            |             |
| C                  | 0.00000000  | 0.00000000 | 0.00000000  |
| C                  | 0.00000000  | 0.00000000 | 2.93130916  |
| W                  | 1.32582143  | 0.00000000 | 1.39603636  |
| W                  | -1.50525671 | 0.57299759 | 1.42601038  |
| C                  | -1.68288639 | 2.51592268 | 0.61737694  |
| C                  | 2.17157459  | 1.77840387 | 1.02102577  |
| W                  | 0.22451602  | 2.07682410 | -0.13519642 |
| W                  | 0.22702219  | 2.30916610 | 2.62328734  |
| C                  | 0.82770559  | 4.07596197 | -0.35396535 |
| C                  | 0.90603298  | 4.52588979 | 2.55048856  |
| W                  | 2.08611905  | 3.78216933 | 1.08709099  |
| W                  | -0.75176021 | 4.33889196 | 1.10099857  |
| C                  | -2.85285587 | 0.77216606 | 3.00758125  |
| C                  | -2.19152784 | 2.96433784 | 4.79660705  |
| W                  | -2.43740519 | 2.85201736 | 2.73490224  |
| W                  | -1.32384326 | 0.81574323 | 4.24674075  |
| C                  | -2.00284290 | 4.94175357 | 2.65040383  |
| C                  | 0.39737607  | 2.45881662 | 4.73064315  |
| W                  | -0.57523574 | 4.51905232 | 3.93766856  |
| W                  | -0.83055103 | 2.80594843 | 6.11361314  |

## 2.2 All states of H<sub>2</sub> dissociation and H diffusion on (WC)<sub>6</sub>

R<sub>1</sub>

|   |             |            |             |
|---|-------------|------------|-------------|
| C | 0.00000000  | 0.00000000 | 0.00000000  |
| C | 0.00000000  | 0.00000000 | 2.69225887  |
| W | 1.46189257  | 0.00000000 | 1.33618014  |
| W | -1.41515103 | 0.34884131 | 1.35146218  |
| C | -1.62444587 | 2.39104227 | 1.37949506  |
| C | 2.24985264  | 1.87236695 | 1.24781252  |
| W | 0.29176891  | 2.13799727 | 0.10636791  |
| W | 0.21084462  | 2.15323745 | 2.56797437  |
| C | 0.55465215  | 4.25702736 | -0.00114732 |
| W | 1.98187380  | 3.86787521 | 1.33501196  |
| C | 0.51785471  | 4.25272343 | 2.68467848  |
| W | -0.93217214 | 4.34316829 | 1.34524385  |
| H | -1.54002977 | 6.14029759 | 1.48220474  |
| H | -2.30905650 | 5.62984001 | 1.53753605  |

P<sub>1</sub>

|   |             |            |            |
|---|-------------|------------|------------|
| C | 0.00000000  | 0.00000000 | 0.00000000 |
| C | 0.00000000  | 0.00000000 | 2.69302500 |
| W | 1.45224187  | 0.00000000 | 1.34470151 |
| W | -1.42564689 | 0.35599391 | 1.34935310 |
| C | -1.58808327 | 2.43993204 | 1.35213209 |
| C | 2.22856952  | 1.86510260 | 1.32098042 |
| W | 0.21452053  | 2.13838033 | 0.11216362 |

|                |             |            |             |
|----------------|-------------|------------|-------------|
| W              | 0.20280382  | 2.15847778 | 2.57611799  |
| C              | 0.55181434  | 4.21432167 | 0.00606999  |
| W              | 1.98779353  | 3.84777713 | 1.34147885  |
| C              | 0.58777136  | 4.20189406 | 2.70198588  |
| W              | -0.93335758 | 4.45464222 | 1.37129333  |
| H              | -1.19916796 | 6.20525792 | 1.50768169  |
| H              | -2.64773806 | 4.84631431 | 1.36185002  |
| P <sub>2</sub> |             |            |             |
| C              | 0.00000000  | 0.00000000 | 0.00000000  |
| C              | 0.00000000  | 0.00000000 | 2.71718739  |
| W              | 1.42271042  | 0.00000000 | 1.36813981  |
| W              | -1.39240138 | 0.38445183 | 1.34786261  |
| C              | -1.57347479 | 2.45324022 | 1.28275129  |
| C              | 2.14191162  | 1.91044466 | 1.32927774  |
| W              | 0.23109228  | 2.14867879 | 0.10814080  |
| W              | 0.21667079  | 2.16374542 | 2.67119929  |
| C              | 0.50431781  | 4.29303809 | -0.02969761 |
| W              | 1.86982687  | 3.94683227 | 1.34197141  |
| C              | 0.49215419  | 4.29859636 | 2.68744716  |
| W              | -0.96892939 | 4.37682016 | 1.30747353  |
| H              | -1.02814499 | 2.31498688 | 3.89557053  |
| H              | -2.31963803 | 5.55595417 | 1.27090330  |
| P <sub>3</sub> |             |            |             |
| C              | 0.00000000  | 0.00000000 | 0.00000000  |
| C              | 0.00000000  | 0.00000000 | 2.71217547  |
| W              | 1.42457209  | 0.00000000 | 1.35625122  |
| W              | -1.38673564 | 0.36353852 | 1.35494122  |
| C              | -1.56511664 | 2.45072971 | 1.36684902  |
| C              | 2.10328748  | 1.97835811 | 1.34271179  |
| W              | 0.27520470  | 2.16594920 | 0.12024848  |
| W              | 0.24081224  | 2.17245958 | 2.59368134  |
| C              | 0.49952362  | 4.31868184 | -0.01103852 |
| W              | 1.94530516  | 4.01636226 | 1.35107137  |
| C              | 0.52974982  | 4.31903225 | 2.71177857  |
| W              | -0.92205583 | 4.39967836 | 1.35487307  |
| H              | 3.53757411  | 4.84235090 | 1.34841322  |
| H              | -2.12146349 | 5.73178621 | 1.31754378  |
| P <sub>4</sub> |             |            |             |
| C              | 0.00000000  | 0.00000000 | 0.00000000  |
| C              | 0.00000000  | 0.00000000 | 2.71918133  |
| W              | 1.46509626  | 0.00000000 | 1.33028750  |
| W              | -1.35660285 | 0.47136651 | 1.34625808  |
| C              | -1.52025546 | 2.53855143 | 1.38349508  |
| C              | 2.60859448  | 1.70270136 | 0.79720065  |
| W              | 0.50404906  | 2.10871917 | 0.10609173  |
| W              | 0.22719056  | 2.14997097 | 2.62975080  |
| C              | 0.80166125  | 4.27881821 | 0.02018194  |
| W              | 2.12577445  | 3.70469424 | 1.36211832  |
| C              | 0.72912640  | 4.19450268 | 2.73752580  |

|                 |             |             |             |
|-----------------|-------------|-------------|-------------|
| W               | -0.69489402 | 4.38552095  | 1.32605188  |
| H               | 3.55836828  | 1.50069409  | 0.24151177  |
| H               | -1.89872408 | 5.71909116  | 1.29649733  |
| P <sub>5</sub>  |             |             |             |
| C               | 0.00000000  | 0.00000000  | 0.00000000  |
| C               | 0.00000000  | 0.00000000  | 2.70741350  |
| W               | 1.47220974  | 0.00000000  | 1.34465080  |
| W               | -1.39417720 | 0.31162618  | 1.36029163  |
| C               | -1.69610529 | 2.36649793  | 1.40990097  |
| C               | 2.01230984  | 1.96123850  | 1.30962719  |
| W               | 0.18256348  | 2.14957116  | 0.11919008  |
| W               | 0.13310031  | 2.17842094  | 2.60056660  |
| C               | 0.31601788  | 4.32840983  | 0.01262621  |
| W               | 1.71008489  | 4.01618094  | 1.35968023  |
| C               | 0.31578857  | 4.32760052  | 2.71978987  |
| W               | -1.15632411 | 4.32777635  | 1.37504077  |
| H               | 2.92730310  | -1.04323954 | 1.26013745  |
| H               | -2.61234951 | 5.37005199  | 1.45680782  |
| TS <sub>1</sub> |             |             |             |
| C               | 0.00000000  | 0.00000000  | 0.00000000  |
| C               | 0.00000000  | 0.00000000  | 2.69086369  |
| W               | 1.46110634  | 0.00000000  | 1.33793689  |
| W               | -1.41550070 | 0.34821453  | 1.35123639  |
| C               | -1.61597830 | 2.39330743  | 1.37747442  |
| C               | 2.25118088  | 1.87106746  | 1.26335510  |
| W               | 0.28625827  | 2.13959441  | 0.11077359  |
| W               | 0.21482991  | 2.15690367  | 2.57016078  |
| C               | 0.56617725  | 4.25347749  | -0.00079353 |
| W               | 1.99107200  | 3.86633279  | 1.33753242  |
| C               | 0.53506938  | 4.25693667  | 2.68720759  |
| W               | -0.92626222 | 4.35173954  | 1.35136217  |
| H               | -1.52698141 | 6.11593768  | 1.45701108  |
| H               | -2.34092175 | 5.54408550  | 1.50600361  |
| TS <sub>2</sub> |             |             |             |
| C               | 0.00000000  | 0.00000000  | 0.00000000  |
| C               | 0.00000000  | 0.00000000  | 2.77680470  |
| W               | 1.43931804  | 0.00000000  | 1.40020405  |
| W               | -1.36006093 | 0.38013805  | 1.37182206  |
| C               | -1.53035876 | 2.38948915  | 1.22899607  |
| C               | 2.27686886  | 1.87195816  | 1.39921364  |
| W               | 0.24698749  | 2.11440039  | 0.04815487  |
| W               | 0.45773216  | 2.16684499  | 2.62061068  |
| C               | 0.66333009  | 4.18713459  | -0.11548657 |
| W               | 2.13961183  | 3.84834308  | 1.12922805  |
| C               | 0.96154166  | 4.18931600  | 2.60735319  |
| W               | -0.81103745 | 4.23554862  | 1.39809862  |
| H               | -2.35935685 | 5.10252601  | 1.48274942  |
| H               | -1.24162780 | 3.79804106  | 3.12541251  |
| TS <sub>3</sub> |             |             |             |



|                 |             |            |             |
|-----------------|-------------|------------|-------------|
| C               | 0.00000000  | 0.00000000 | 0.00000000  |
| C               | 0.00000000  | 0.00000000 | 2.72461721  |
| W               | 1.44391169  | 0.00000000 | 1.35071503  |
| W               | -1.40161733 | 0.43505554 | 1.36326425  |
| C               | -1.55778168 | 2.51683591 | 1.35763498  |
| C               | 2.20891592  | 1.91088480 | 1.26474559  |
| W               | 0.33521212  | 2.12281015 | 0.09577589  |
| W               | 0.22552480  | 2.13631857 | 2.61110011  |
| C               | 0.60917546  | 4.15443683 | -0.03433382 |
| W               | 1.94755735  | 3.96788649 | 1.37858952  |
| C               | 0.54843272  | 4.14984940 | 2.79155000  |
| W               | -0.79879783 | 4.46751646 | 1.36943130  |
| H               | 0.72865412  | 5.86131046 | 1.40455040  |
| H               | -2.03978434 | 5.75128959 | 1.47941869  |
| TS <sub>4</sub> |             |            |             |
| C               | 0.00000000  | 0.00000000 | 0.00000000  |
| C               | 0.00000000  | 0.00000000 | 2.75773075  |
| W               | 1.53604613  | 0.00000000 | 1.39855879  |
| W               | -1.31902383 | 0.39218468 | 1.38736031  |
| C               | -1.43951210 | 2.43535610 | 1.50185430  |
| C               | 2.24942614  | 1.93382469 | 1.24141102  |
| W               | 0.36823538  | 2.13279913 | 0.16404981  |
| W               | 0.53953914  | 2.04517971 | 2.68202118  |
| C               | 0.64719017  | 4.31195175 | 0.08644364  |
| W               | 2.12283331  | 3.96882271 | 1.32662585  |
| C               | 0.87457344  | 4.21741460 | 2.79639657  |
| W               | -0.70793609 | 4.31318945 | 1.54942821  |
| H               | 2.21022054  | 0.56136330 | 3.10372981  |
| H               | -2.10671815 | 5.42761689 | 1.63666460  |
| TS <sub>5</sub> |             |            |             |
| C               | 0.00000000  | 0.00000000 | 0.00000000  |
| C               | 0.00000000  | 0.00000000 | 2.71861826  |
| W               | 1.42664705  | 0.00000000 | 1.32926921  |
| W               | -1.38912052 | 0.43257766 | 1.36101219  |
| C               | -1.61140618 | 2.50368173 | 1.40555897  |
| C               | 2.30384935  | 1.85483268 | 1.01041557  |
| W               | 0.31135635  | 2.15022991 | 0.08222710  |
| W               | 0.10792415  | 2.17890854 | 2.64425207  |
| C               | 0.49747160  | 4.25480086 | -0.03078587 |
| W               | 1.93652896  | 3.76555609 | 1.34462923  |
| C               | 0.45883839  | 4.23932366 | 2.74144238  |
| W               | -0.92526980 | 4.40848186 | 1.32316213  |
| H               | 3.53954212  | 2.78662447 | 1.13170789  |
| H               | -2.00998759 | 5.84188782 | 1.23939447  |
| TS <sub>6</sub> |             |            |             |
| C               | 0.00000000  | 0.00000000 | 0.00000000  |
| C               | 0.00000000  | 0.00000000 | 2.72079902  |
| W               | 1.52669010  | 0.00000000 | 1.32479957  |
| W               | -1.37539033 | 0.40598927 | 1.36436635  |

|   |             |            |            |
|---|-------------|------------|------------|
| C | -1.53897620 | 2.45792241 | 1.43071986 |
| C | 2.41240167  | 1.73576399 | 1.05775435 |
| W | 0.43406174  | 2.06815289 | 0.09710330 |
| W | 0.23690901  | 2.10161716 | 2.63587766 |
| C | 0.74615498  | 4.21094982 | 0.01555372 |
| W | 2.09900502  | 3.77385560 | 1.35000375 |
| C | 0.72640943  | 4.18315651 | 2.72790199 |
| W | -0.74846730 | 4.31434468 | 1.35919776 |
| H | 3.31432793  | 0.55691128 | 1.16155468 |
| H | -2.13257974 | 5.45207109 | 1.32611278 |

### 2.3 Fully H-saturated (WC)<sub>n</sub> (n=2,4,6,9) clusters

#### (WC)<sub>2</sub>H<sub>8</sub>

|   |             |             |             |
|---|-------------|-------------|-------------|
| C | 0.00000000  | 0.00000000  | 0.00000000  |
| H | 0.00000000  | 0.00000000  | 1.09804002  |
| W | 1.59531600  | 0.00000000  | -1.35442326 |
| H | 2.30182064  | 1.55924459  | -1.55808810 |
| H | 2.33502485  | -1.51057957 | -1.74819288 |
| H | 3.32257434  | -0.03797546 | -1.24261539 |
| C | 0.35913935  | 0.01987831  | -2.81735329 |
| H | 0.35781983  | 0.02139286  | -3.91586765 |
| W | -1.24101102 | 0.12966590  | -1.45692556 |
| H | -2.96124461 | 0.29969826  | -1.58320086 |
| H | -1.70560980 | 1.70974367  | -0.96730647 |
| H | -2.01272917 | -1.32511747 | -0.95786785 |

#### (WC)<sub>4</sub>H<sub>12</sub>

|   |             |             |             |
|---|-------------|-------------|-------------|
| C | 0.00000000  | 0.00000000  | 0.00000000  |
| C | 0.00000000  | 0.00000000  | 2.99315354  |
| W | 1.36914463  | 0.00000000  | 1.44973442  |
| W | -1.55940103 | 0.44592457  | 1.54899021  |
| C | -1.42201497 | 2.51313699  | 2.23671049  |
| C | 1.50221482  | 2.09815916  | 1.51863762  |
| W | -0.30163618 | 2.13190307  | 0.29497909  |
| W | 0.23864152  | 2.09158141  | 3.20971051  |
| H | 0.51788212  | 2.86520386  | 4.75547541  |
| H | -0.64277279 | 2.04147664  | -1.40772845 |
| H | -2.53732677 | -0.39241532 | 0.37516768  |
| H | 2.60255132  | -1.23594298 | 1.32878445  |
| H | -1.49418720 | 3.27942220  | -0.24719065 |
| H | -3.25109089 | 0.87128449  | 1.53602069  |
| H | 2.36678671  | 2.73741861  | 1.33737001  |
| H | 2.99850620  | 0.53008300  | 1.13465120  |
| H | -2.15731276 | 3.29744689  | 2.44592404  |
| H | 0.04066908  | -0.64002427 | 3.89183759  |
| H | 1.37862776  | 3.40280603  | 3.23991423  |
| H | -0.00879892 | -0.56655551 | -0.93645805 |

#### (WC)<sub>6</sub>H<sub>16</sub>

|   |            |            |             |
|---|------------|------------|-------------|
| C | 0.00000000 | 0.00000000 | 0.00000000  |
| H | 0.00000000 | 0.00000000 | 1.09777904  |
| C | 1.69804184 | 0.00000000 | -2.34233433 |

|   |             |             |             |
|---|-------------|-------------|-------------|
| H | 2.73776852  | -0.11806404 | -2.67365081 |
| W | 0.61472353  | -1.46219444 | -1.44109426 |
| H | 1.25529228  | -2.20823325 | 0.00351136  |
| H | 1.05336273  | -3.15190074 | -1.61047441 |
| W | 0.77156209  | 1.46380220  | -1.15100350 |
| H | 2.44872503  | 1.83699349  | -0.83206068 |
| H | 1.06630429  | 3.11115204  | -0.61741041 |
| C | -1.07558094 | 1.98390679  | -2.23091022 |
| H | -0.70769500 | 2.89592433  | -1.64961125 |
| C | -0.98278185 | -1.55790483 | -2.89213735 |
| H | -0.60222520 | -2.62196474 | -2.78605688 |
| W | -1.72400935 | -0.15067387 | -1.39318317 |
| H | -2.51638976 | -1.45649349 | -0.52962055 |
| W | -0.16332688 | 0.51358445  | -3.49089006 |
| H | 0.55602652  | 1.72275320  | -4.55583827 |
| C | -3.62959782 | 0.22177552  | -2.43627449 |
| W | -2.69363569 | -1.03767435 | -3.83455265 |
| C | -1.98305959 | 0.62575697  | -4.82279958 |
| H | -2.02850019 | 0.82222480  | -5.90548874 |
| W | -2.72105191 | 1.89222790  | -3.33804382 |
| H | -3.28167312 | 3.48736680  | -3.78296437 |
| H | -4.32874841 | 2.28122295  | -2.77881545 |
| H | -2.93569649 | -2.59006830 | -4.60315239 |
| H | -4.59996027 | 0.13043658  | -1.94651928 |
| H | -4.32736761 | -1.63249863 | -3.72804476 |

(WC)<sub>9</sub>H<sub>22</sub>

|   |             |             |             |
|---|-------------|-------------|-------------|
| C | 0.00000000  | 0.00000000  | 0.00000000  |
| H | 0.00000000  | 0.00000000  | 1.16002885  |
| C | 1.73497938  | 0.00000000  | -2.40985096 |
| H | 2.77694870  | -0.04650287 | -2.73833964 |
| W | 0.511105838 | -1.56131815 | -1.41907199 |
| H | 1.97482482  | -2.46964349 | -1.75128955 |
| W | 0.89988309  | 1.33347465  | -1.15352372 |
| H | 2.24968101  | 1.04529708  | -0.08445068 |
| H | 1.59300609  | 2.88167505  | -0.65685775 |
| C | -0.79175391 | 1.84442650  | -2.48166362 |
| H | -0.31674494 | 2.81058590  | -2.10567024 |
| C | -0.56604031 | -1.95560762 | -3.27767045 |
| H | -0.10265882 | -2.69553140 | -3.94421518 |
| W | -1.80241411 | 0.20550392  | -1.32682270 |
| H | -2.45545461 | 1.43389228  | -0.25991768 |
| W | -0.09121386 | 0.11217241  | -3.64303916 |
| H | 1.22082535  | -0.44174568 | -4.66293481 |
| C | -3.62613205 | 0.42332725  | -2.60154215 |
| W | -2.51195605 | -1.06596103 | -3.83494824 |
| C | -1.76097525 | 0.60582329  | -5.05702587 |
| H | -1.80710599 | 0.71016113  | -6.15052091 |
| W | -2.39977297 | 1.88889308  | -3.68578875 |
| H | -3.49091344 | 3.24274796  | -4.00852066 |

|   |             |             |             |
|---|-------------|-------------|-------------|
| H | -1.53062396 | 3.22713986  | -4.41535784 |
| C | -0.34255782 | -3.21492703 | -0.29520773 |
| H | -0.08953287 | -4.24658135 | -0.03049670 |
| W | -1.05062729 | -1.70210685 | 0.86696852  |
| H | -1.75668586 | -3.04764832 | 1.74195245  |
| H | -0.72162939 | -1.45867548 | 2.58813187  |
| C | -2.78766050 | -1.44681667 | -0.10762387 |
| H | -3.80115949 | -1.49406024 | 0.42688739  |
| W | -1.93981013 | -2.68631971 | -1.77135144 |
| H | -1.51981326 | -4.31369152 | -2.27711959 |
| C | -3.88865271 | -2.52266910 | -2.84343572 |
| H | -4.49731231 | -3.34524346 | -3.24385180 |
| W | -4.40995484 | -1.10720724 | -1.56358782 |
| H | -5.86287145 | -0.70376247 | -2.46226395 |
| H | -5.79201046 | -1.13772614 | -0.45659802 |
| H | -4.26585371 | 1.33556116  | -2.87757534 |
| H | -2.43138982 | -2.07050826 | -5.27481655 |
